# Supplementary material
Source: Elsevier journal article supplement (https://www.sciencedirect.com/science/article/pii/S0025775321007181)
Supplement: mmc1 [file S0025775321007181:mmc1.pdf]

## Supplementary material

Table 1. Non cardiac surgery procedures evaluated

| Code            | Description                                                    | Elected / urgent                                                                                            |
|-----------------|----------------------------------------------------------------|-------------------------------------------------------------------------------------------------------------|
| 79.15 and 79.35 | Closed or open femur fracture reduction with internal fixation | 79.15 and 79.35 programmed and also emergency admissions with main diagnosis of femur fracture (820.**).    |
| 57.49           | Transurethral local bladder excision                           |                                                                                                             |
| 81.54           | Total knee replacement                                         |                                                                                                             |
| 81.51           | Total hip replacement                                          |                                                                                                             |
| 51.23 and 51.22 | Laparoscopic/open cholecystectomy                              | 51.23 and 51.22 programmed and also in emergency admissions with main diagnosis of cholelithiasis (574.**). |
| 60.29           | Transurethral prostatectomy                                    |                                                                                                             |

Supplementary table 2. Number of procedures and percentage of heart failure (HF)

| Procedure                                                      | Total            | HF            | % HF        |
|----------------------------------------------------------------|------------------|---------------|-------------|
| Closed or open femur fracture reduction with internal fixation | 258.398          | 13.825        | 5,4%        |
| Transurethral local bladder excision                           | 276.055          | 2.611         | 0,9%        |
| Total knee replacement                                         | 348.530          | 2.397         | 0,7%        |
| Total hip replacement                                          | 179.013          | 1.107         | 0,6%        |
| Laparoscopic/open cholecystectomy                              | 474.754          | 4.244         | 0,9%        |
| Transurethral prostatectomy                                    | 109.959          | 831           | 0,8%        |
| <b>Total</b>                                                   | <b>1.646.709</b> | <b>25.015</b> | <b>1,5%</b> |
